# Supplementary material for: Metal–organic framework derived carbon-encapsulated hollow CuO/Cu2O heterostructure heterohedron as an efficient electrocatalyst for hydrogen evolution reaction
Source: Royal Society of Chemistry journal article supplement (doi:10.1039/d1dt04163k), 2022-01-01
Supplement: d1dt04163k1.pdf [file d1dt04163k1.pdf]

**Metal-Organic Framework Derived Carbon-Encapsulated Hollow  
CuO/Cu<sub>2</sub>O heterostructure heterohedron as an Efficient  
Electrocatalyst for Hydrogen Evolution Reaction**

Lixin Zhang,<sup>\*a,b</sup> Congli Wang,<sup>c</sup> Hongfang Jiu,<sup>\*c</sup> Qianwen Xu,<sup>c</sup> Xin Li,<sup>b</sup> Wei Song,<sup>b</sup>  
Shiyu Luo,<sup>b</sup> and Jiahui Zhao,<sup>b</sup>

<sup>a</sup> Shanxi Key Laboratory of High Performance Battery Materials and Devices,  
North University of China, Taiyuan, 030051, People's Republic of China

<sup>b</sup> School of Chemical Engineering and Technology, North University of China,  
Taiyuan, 030051, People's Republic of China

<sup>c</sup> School of Science, North University of China, Taiyuan, 030051, People's Republic  
of China

\* Corresponding author.

E-mail address: edwardzlx@163.com (L. X. Zhang), hongfangjiu@163.com (H. F.  
Jiu)

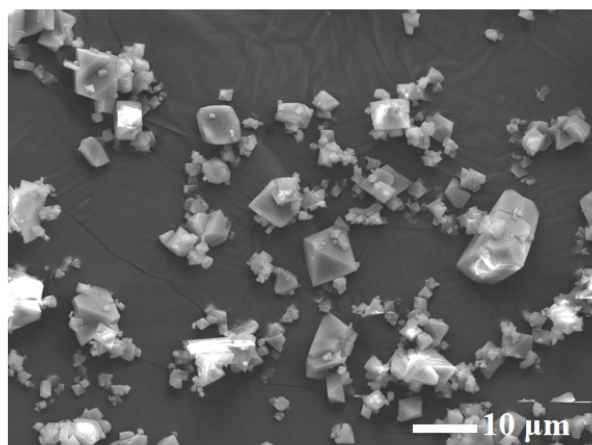

**Fig. S1.** SEM image of Cu-BTC.

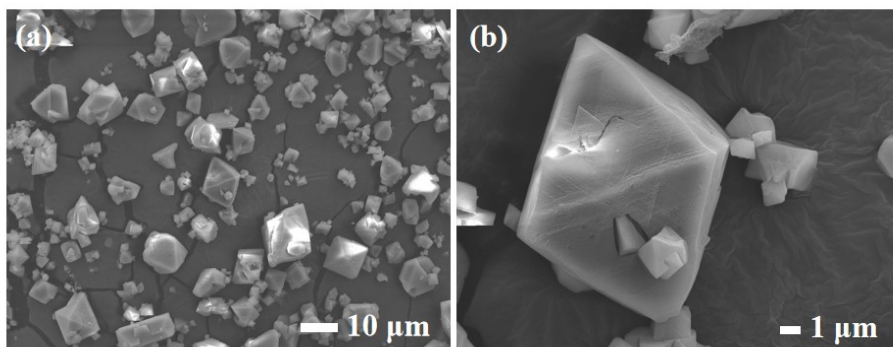

**Fig. S2.** SEM images of TA-Cu.

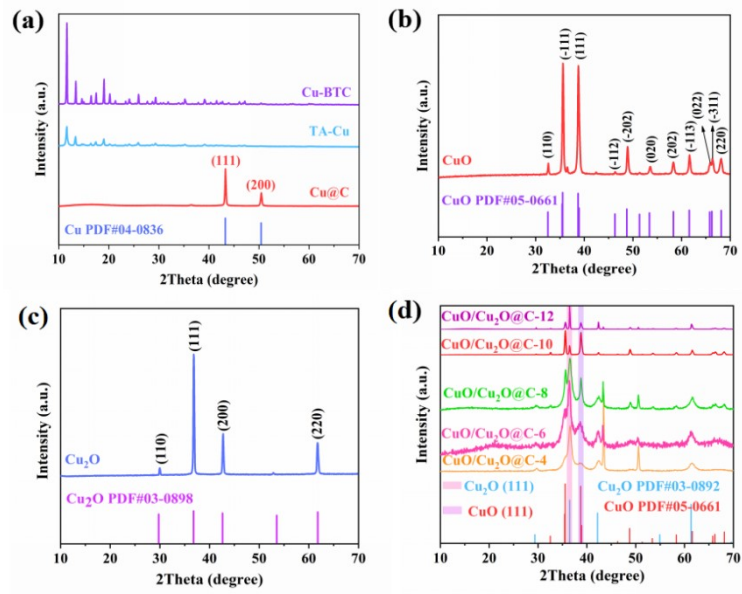

**Fig. S3.** XRD patterns of (a) Cu-BTC, TA-Cu, Cu@C, (b) pure CuO, (c) pure Cu<sub>2</sub>O, (d) CuO/Cu<sub>2</sub>O@C materials with different oxidation time.

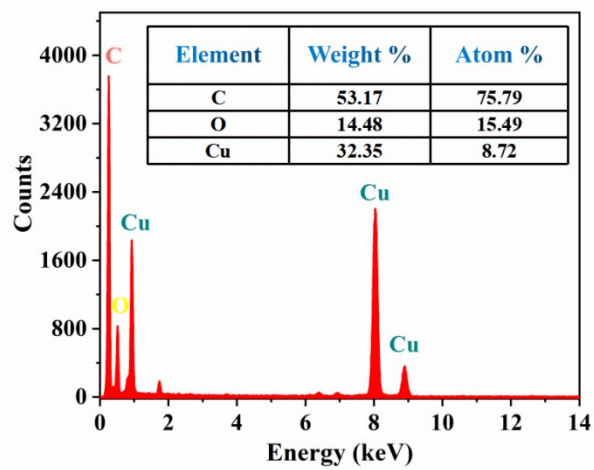

**Fig. S4.** EDS of C, O, Cu elements in the composites, and the insets are the weight and atom ratio.

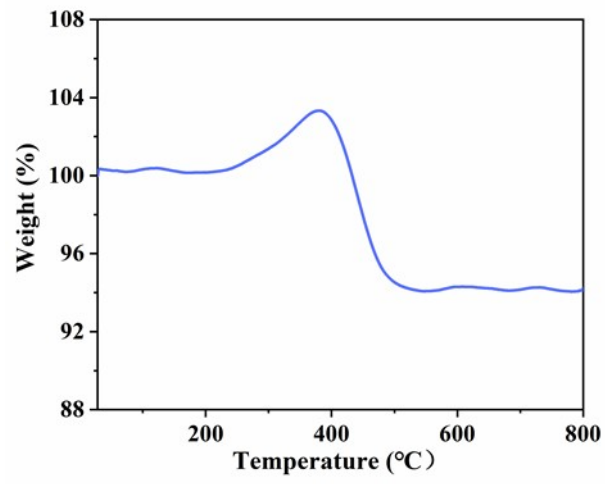

**Fig. S5.** TG curve of CuO/Cu<sub>2</sub>O@C-10 material.

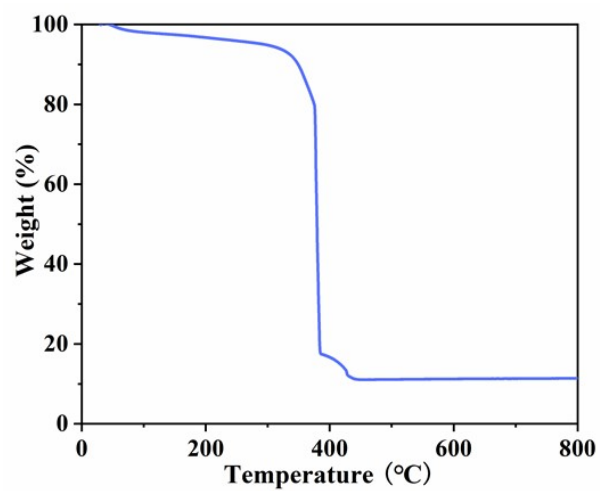

**Fig. S6.** TG curve of cure C.

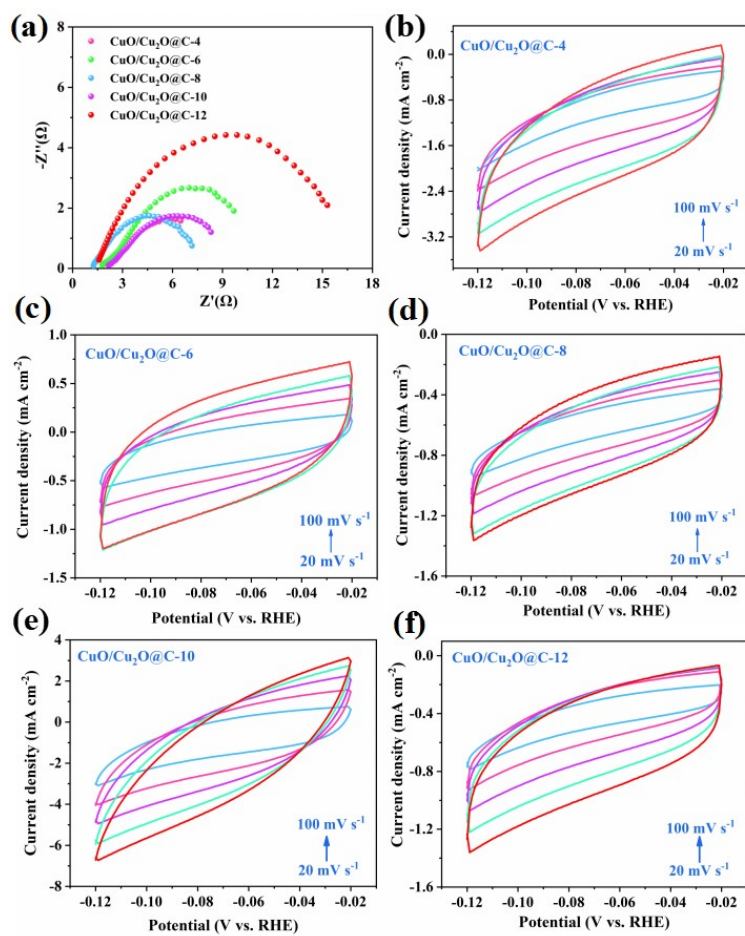

**Fig. S7.** (a) Nyquist plots of CuO/Cu<sub>2</sub>O@C with different oxidation time. (b-f) CV curves of CuO/Cu<sub>2</sub>O@C-4, CuO/Cu<sub>2</sub>O@C-6, CuO/Cu<sub>2</sub>O@C-8, CuO/Cu<sub>2</sub>O@C-10, CuO/Cu<sub>2</sub>O@C-12, respectively.



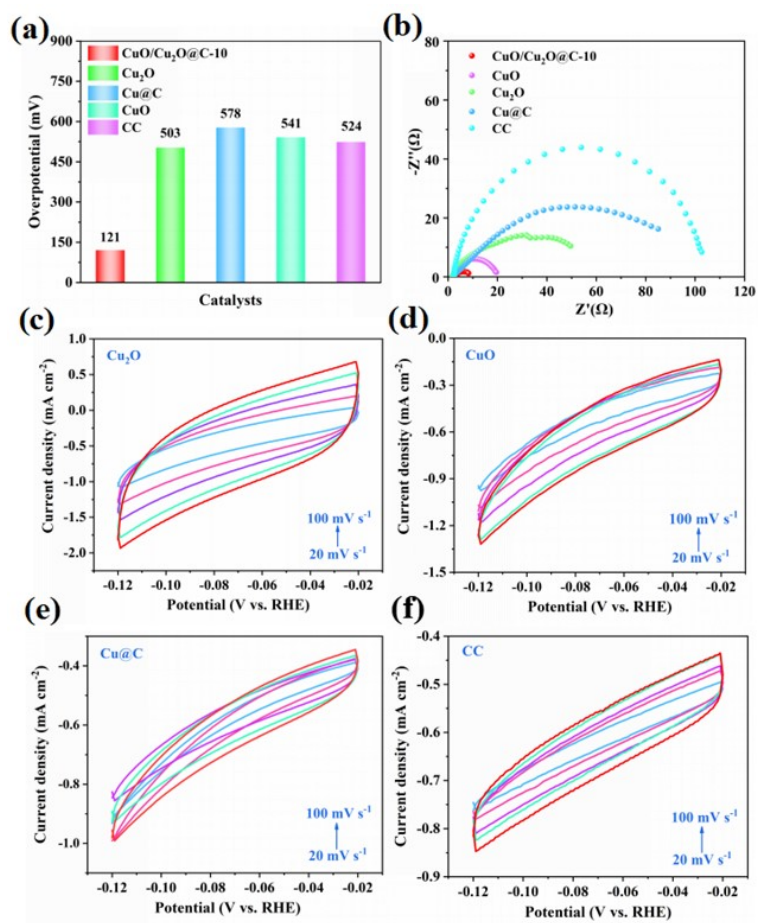

**Fig. S8.** (a) Overpotential column graphs of the different materials, (b) Nyquist plots, (c-f) CV curves of Cu<sub>2</sub>O, CuO, Cu@C, CC respectively.

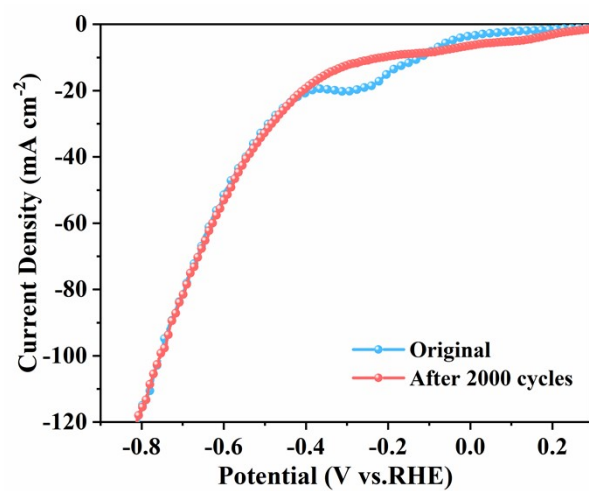

**Fig. S9.** The polarization curves of CuO/Cu<sub>2</sub>O@C-10 before and after 2000 CV scan cycles.

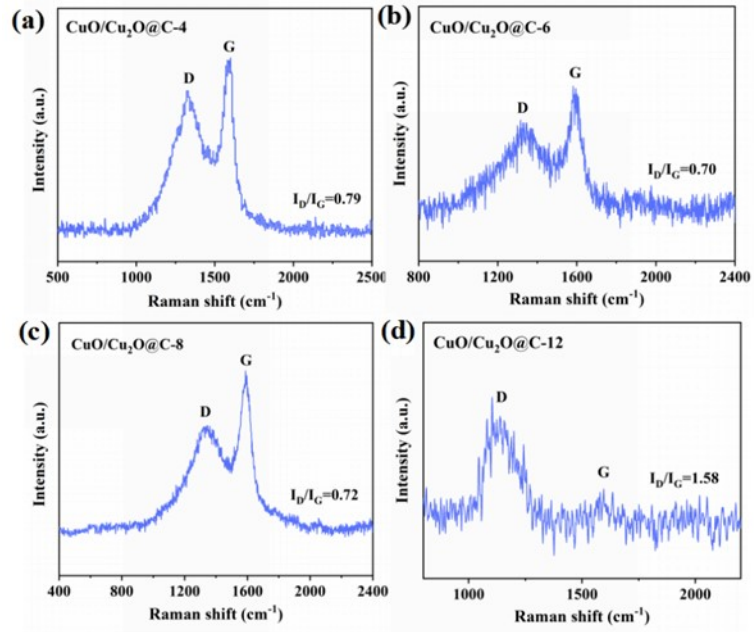

**Fig. S10.** Raman spectroscopy of CuO/Cu<sub>2</sub>O@C with different oxidation time (4, 6, 8, 12 h).

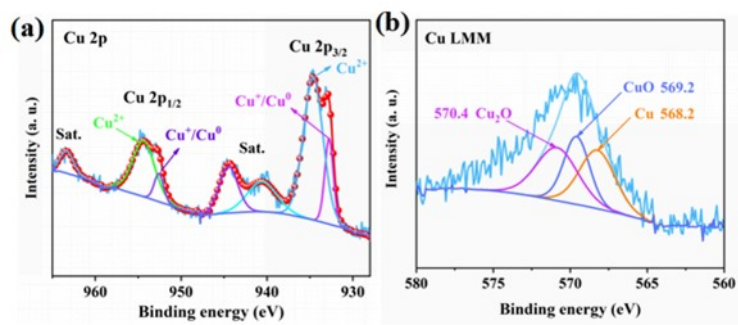

**Fig. S11.** XPS of CuO/Cu<sub>2</sub>O@C-10 after HER test. (a) Cu 2p, (b) Cu LMM.

**Table. S1.** Comparison of HER performance with reported Copper-based electrocatalysts in alkaline media

| Catalysts                                                   | J<br>(mA cm <sup>-2</sup> ) | $\eta$<br>(mV) | Tafel slope<br>(mV dec <sup>-1</sup> ) | Stability test                | Ref.      |
|-------------------------------------------------------------|-----------------------------|----------------|----------------------------------------|-------------------------------|-----------|
| CuO/Cu <sub>2</sub> O@C                                     | 10                          | 121            | 81.58                                  | 20 h                          | This work |
| Cu <sub>2</sub> O@TiO <sub>2</sub>                          | 10                          | 114            | 67                                     | 24 h                          | [19]      |
| CuO@Cu <sub>2</sub> O                                       | 10                          | 135            | 135                                    | 20 h                          | [20]      |
| Cu <sub>2</sub> O/g-C <sub>3</sub> N <sub>4</sub>           | 12.8                        | 148.7          | 55                                     | None                          | [22]      |
| CuO/NH <sub>2</sub> -UiO-66                                 | 10                          | 166            | 86                                     | continuous 1000<br>LSV sweeps | [23]      |
| Ag@Cu <sub>2</sub> O/CF                                     | 10                          | 108            | 58                                     | 20 h                          | [49]      |
| Cu NDs/Ni <sub>3</sub> S <sub>2</sub><br>/NTs-carbon fibers | 10                          | 128            | 76.2                                   | 30 h                          | [50]      |
| Cu <sub>2</sub> O                                           | 10                          | 145            | 229                                    | None                          | [51]      |
| Cu <sub>2</sub> O-200                                       | 10                          | 184            | 106                                    | 20 h                          | [52]      |
| Cu <sub>2</sub> O@Fe <sub>2</sub> O <sub>3</sub> @CC-500    | 10                          | 188            | 55                                     | 20 h                          | [53]      |
| Cu <sub>2</sub> O/NF                                        | 10                          | 197            | 138.65                                 | 24 h                          | [54]      |
| CuO@UiO-66/NF                                               | 10                          | 220            | 164                                    | 600 sec                       | [55]      |
| Cu/Cu-MOF/GO                                                | 10                          | 250            | 201                                    | 15 h                          | [56]      |
| Cu <sub>2</sub> O/C                                         | 10                          | 284            | 225                                    | 10 h                          | [57]      |
